# Supplementary material
Source: PubMed Central journal article supplement (PMC7731792)

**Figure S1**

**A**

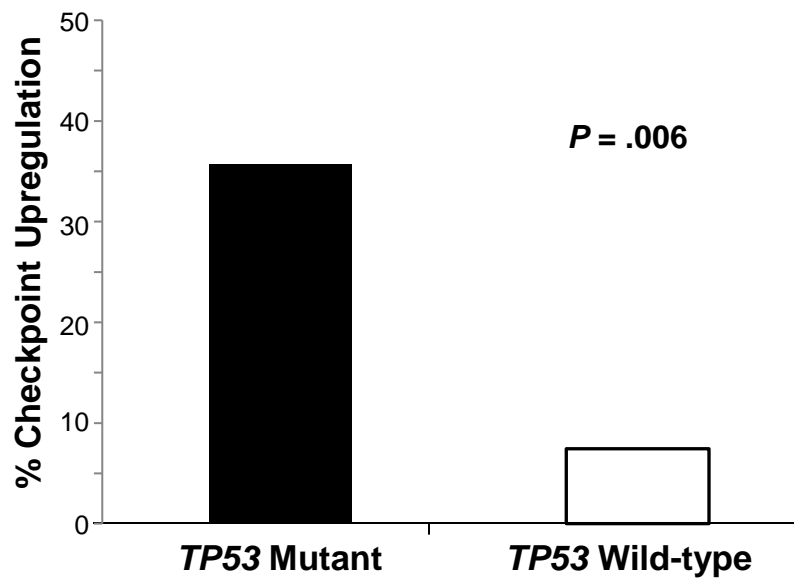

**B**

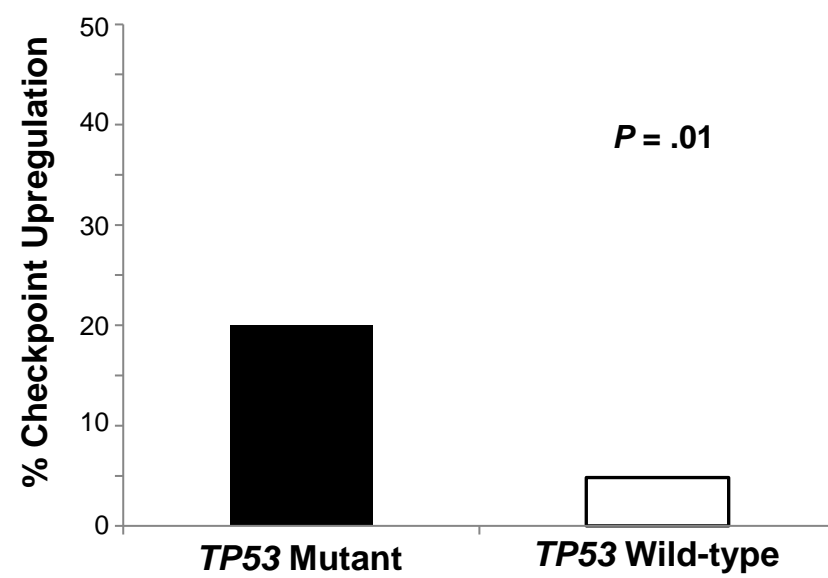

**C**

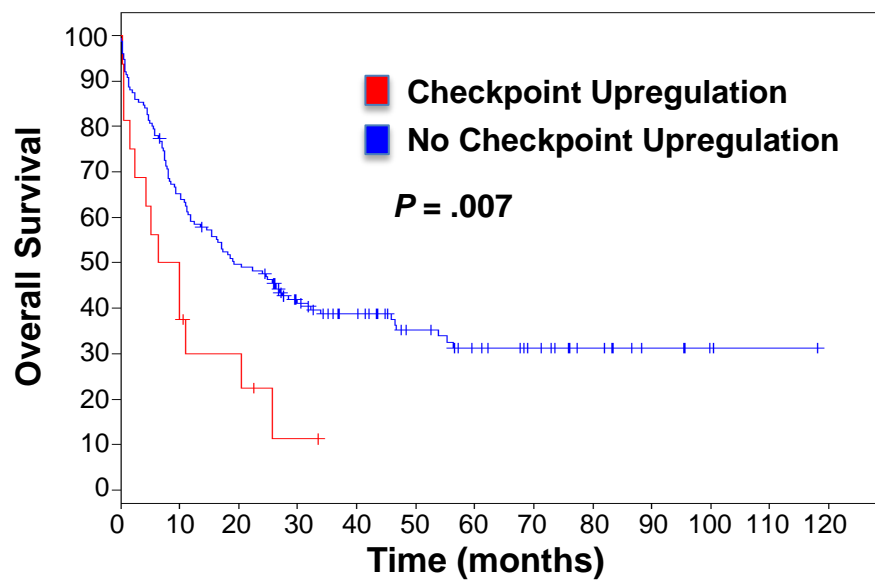

**Figure S2**

**A**

**TCGA Dataset**

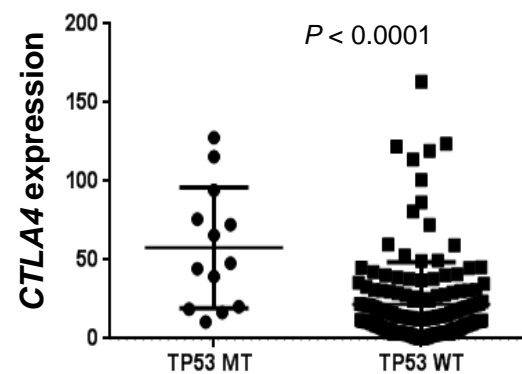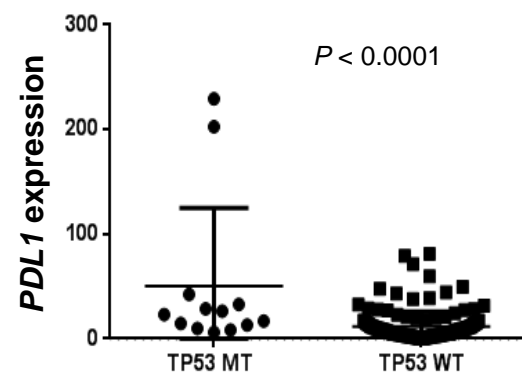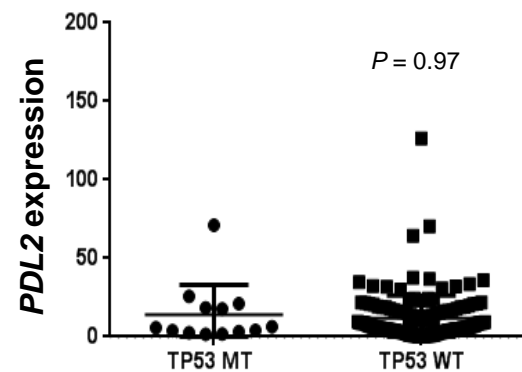

**B**

**MLL Dataset**

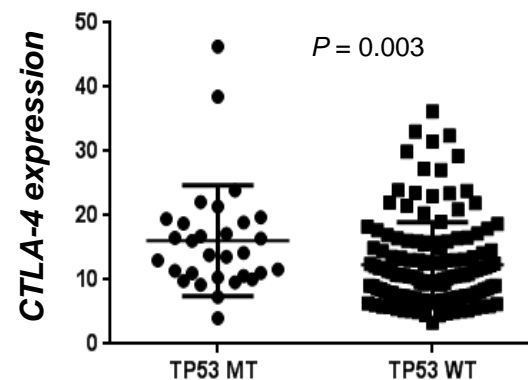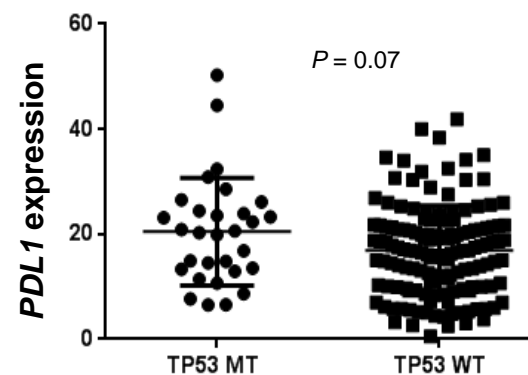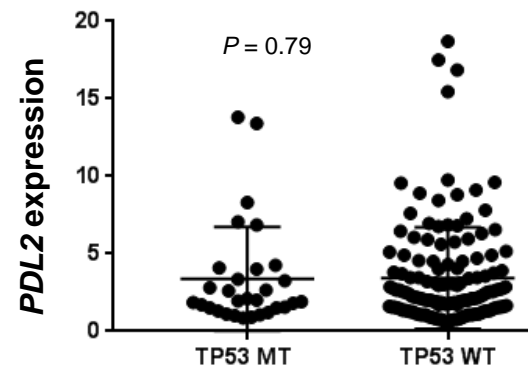

**Figure S3**

**A**

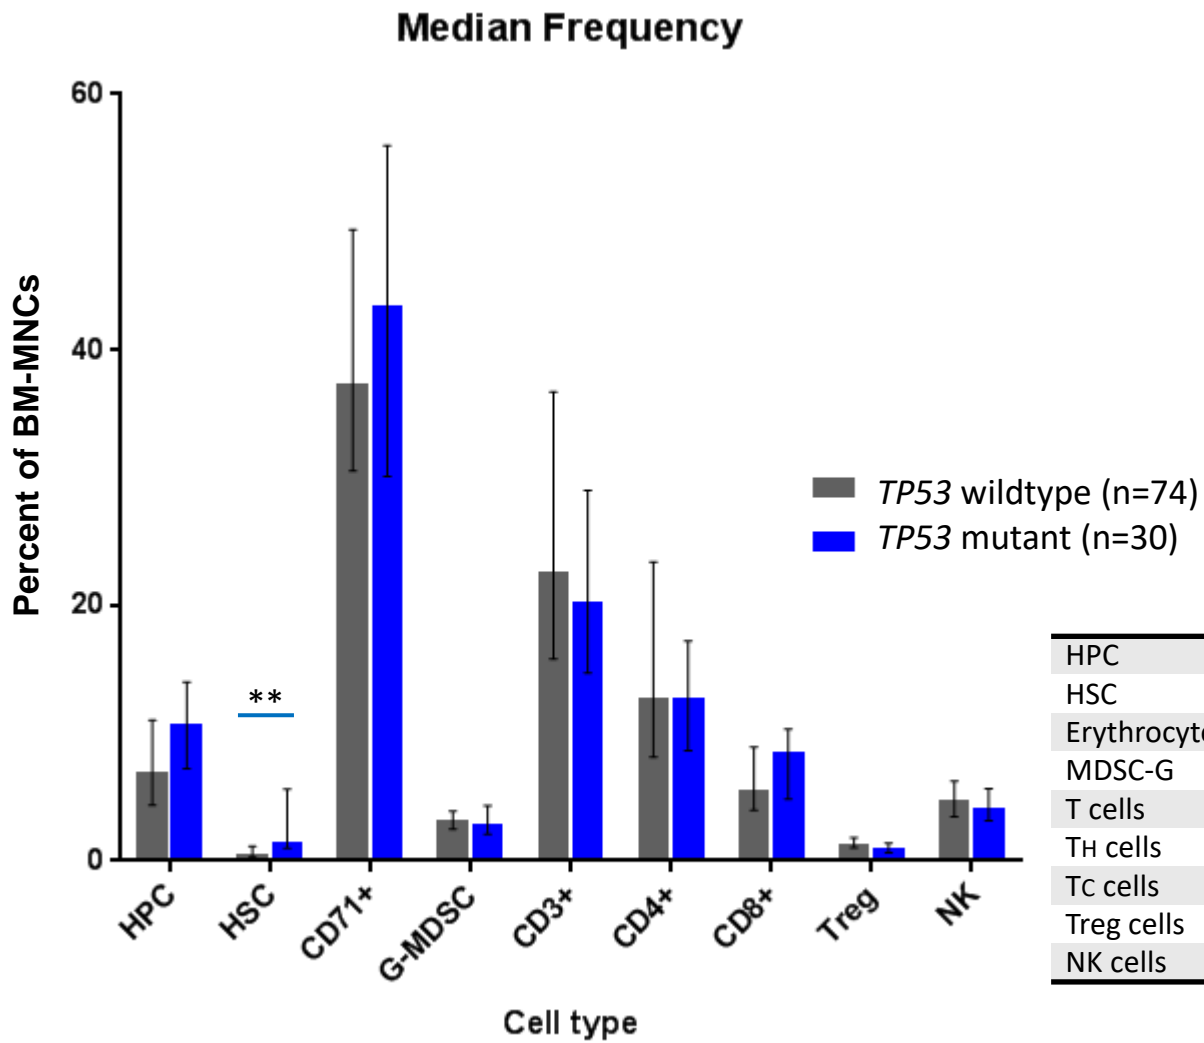

**B**

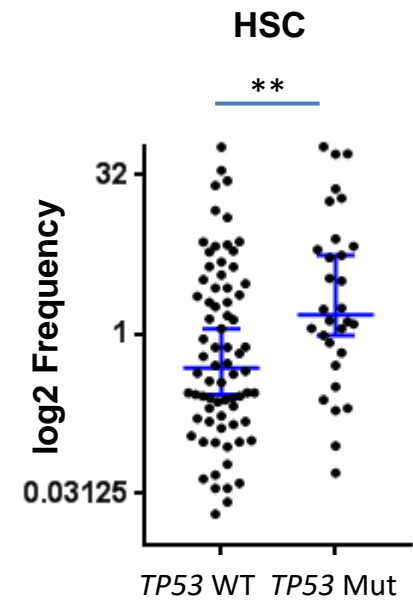

|              |                               |
|--------------|-------------------------------|
| HPC          | CD3- CD11b- CD14- CD34+ CD38+ |
| HSC          | CD3- CD11b- CD14- CD34+ CD38- |
| Erythrocytes | CD3- CD71+                    |
| MDSC-G       | CD3- CD33+ CD38- CD11b+ CD14- |
| T cells      | CD3+                          |
| TH cells     | CD3+ CD4+                     |
| Tc cells     | CD3+ CD8+                     |
| Treg cells   | CD3+ CD4+ CD25+ CD127low/-    |
| NK cells     | CD3- CD56+                    |

**Figure S4**

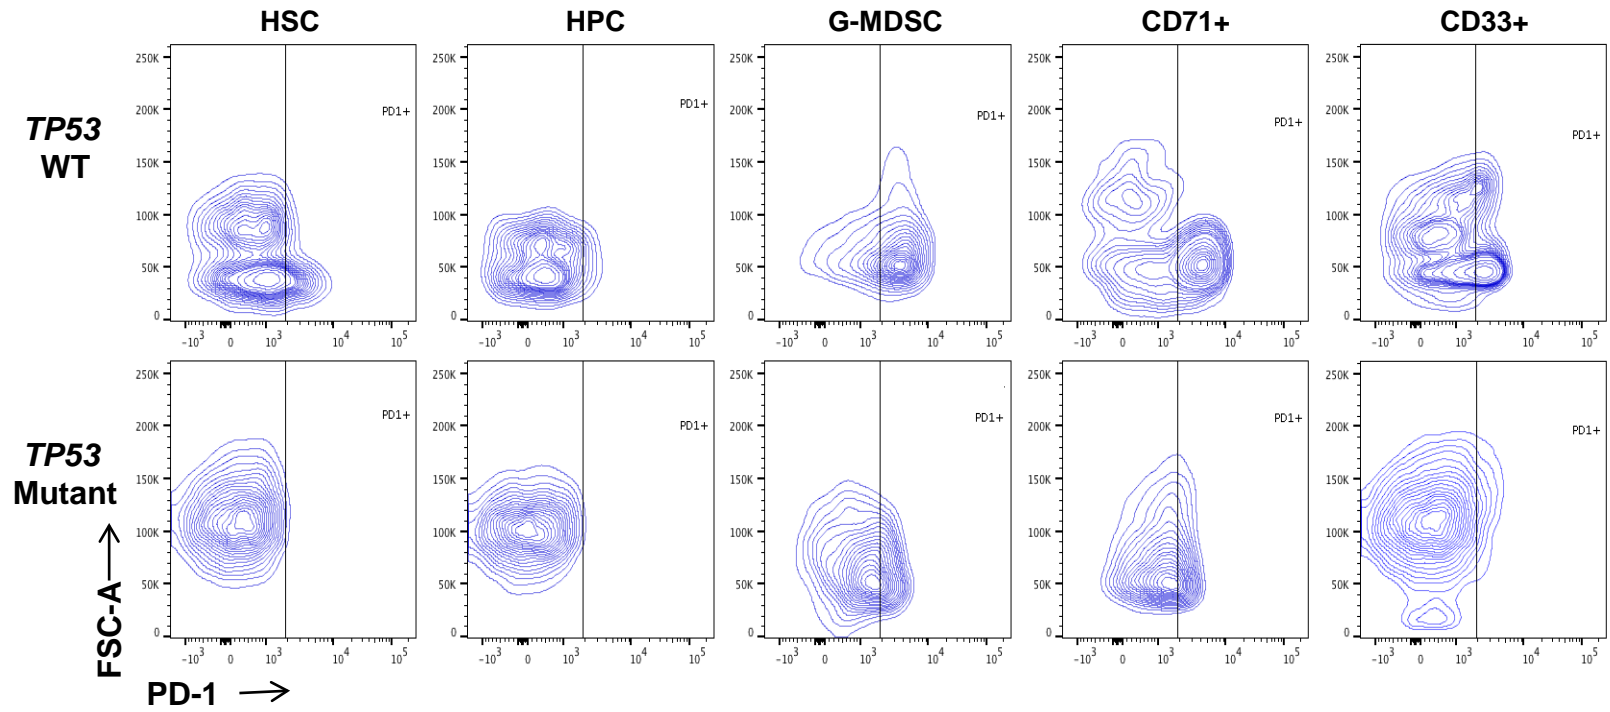

**Figure S5**

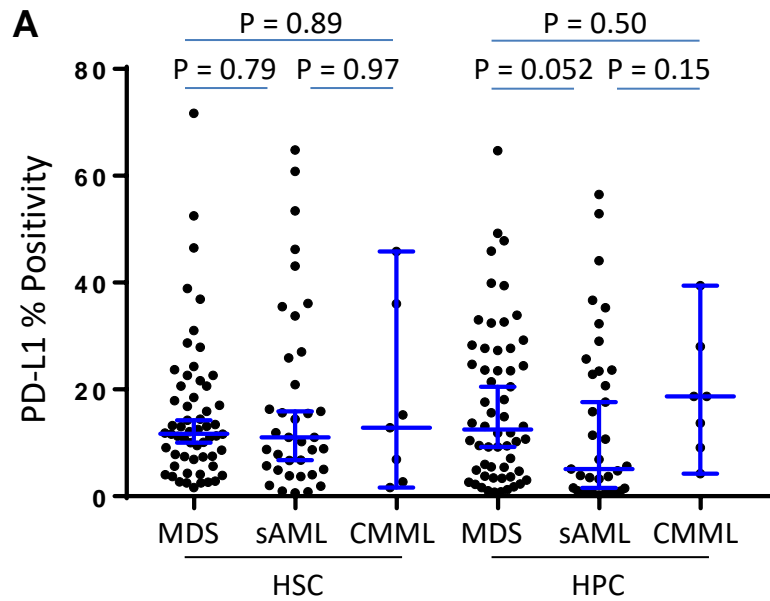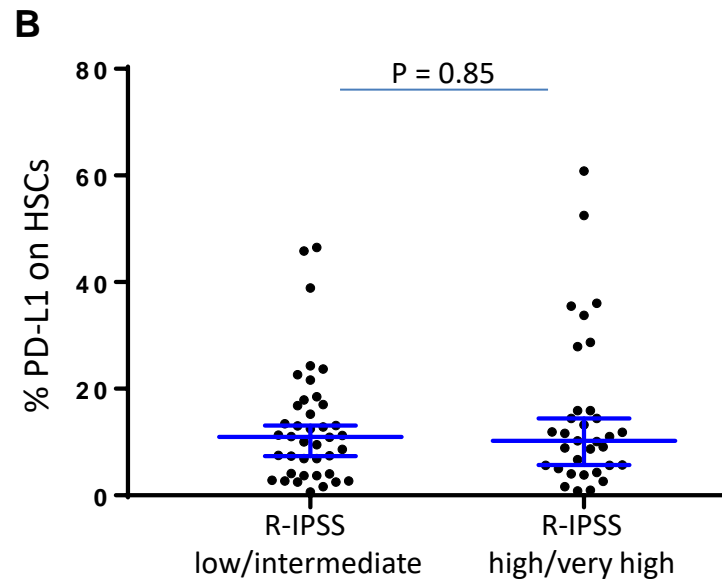

**Figure S6**

**A**

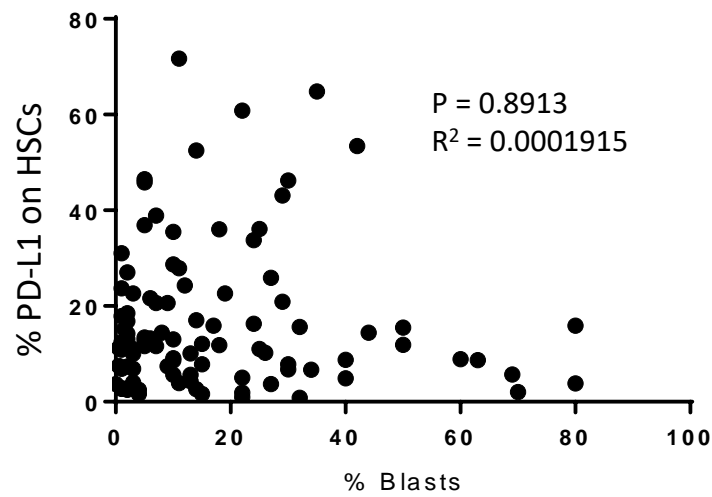

**B**

***TP53* mutant patients**

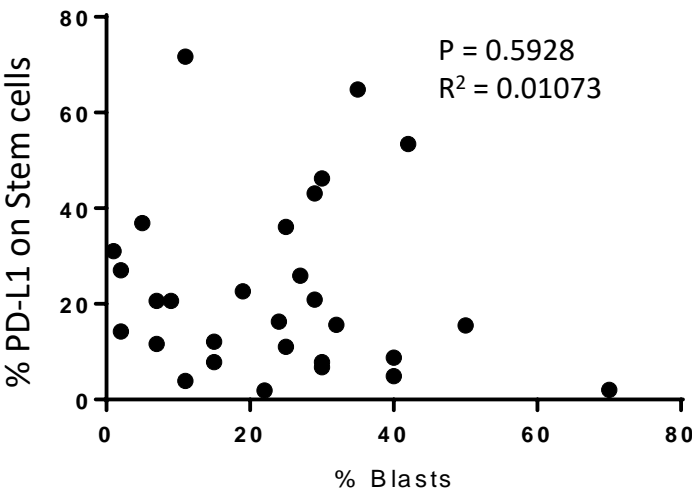

**C**

***TP53* wildtype patients**

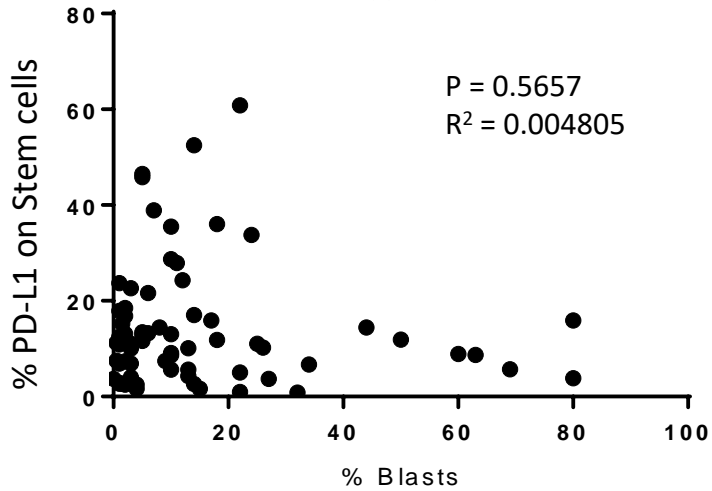

Figure S7

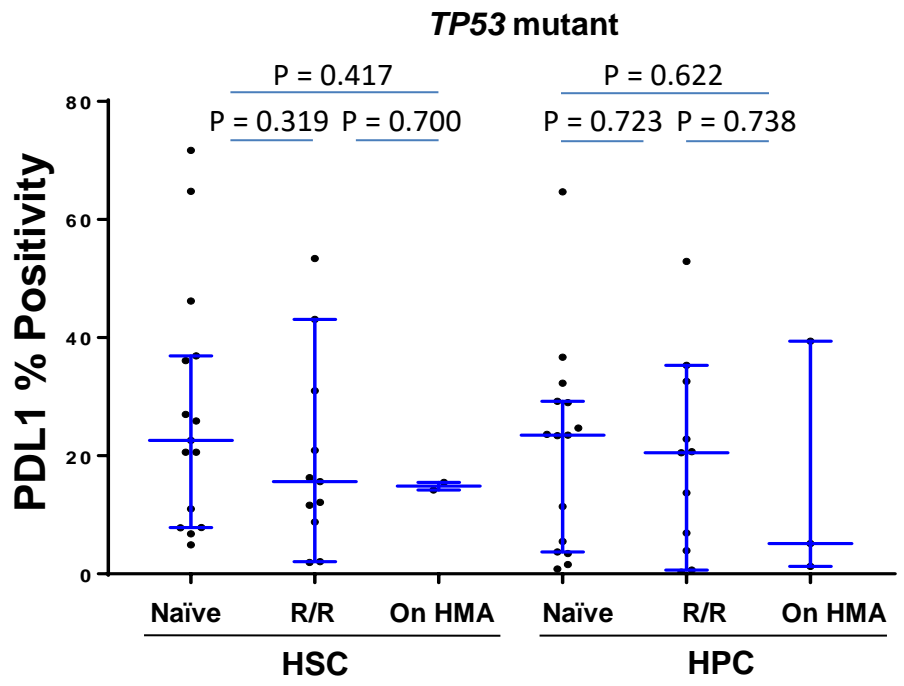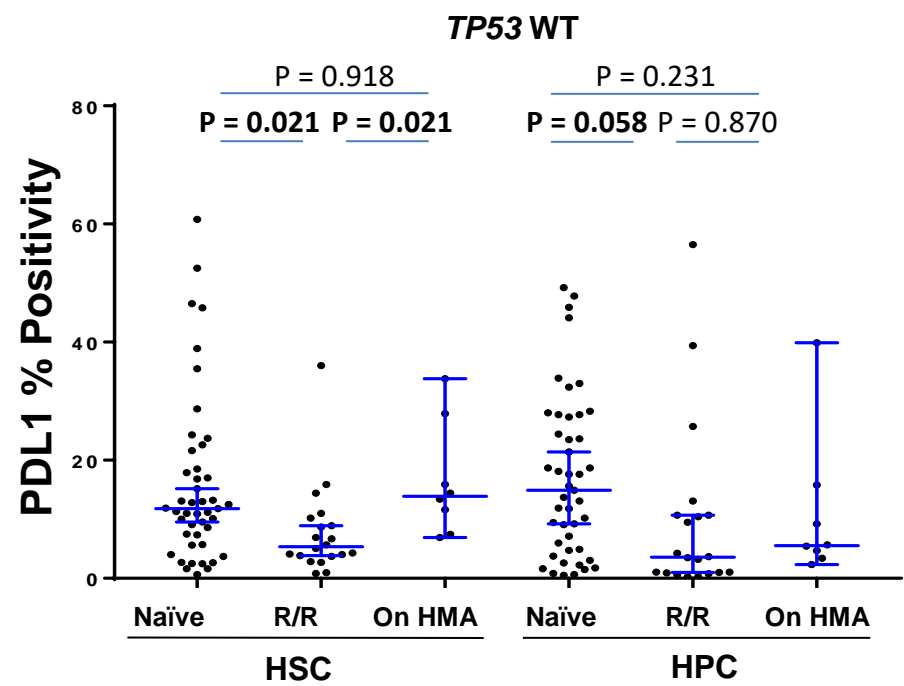

**Figure S8**

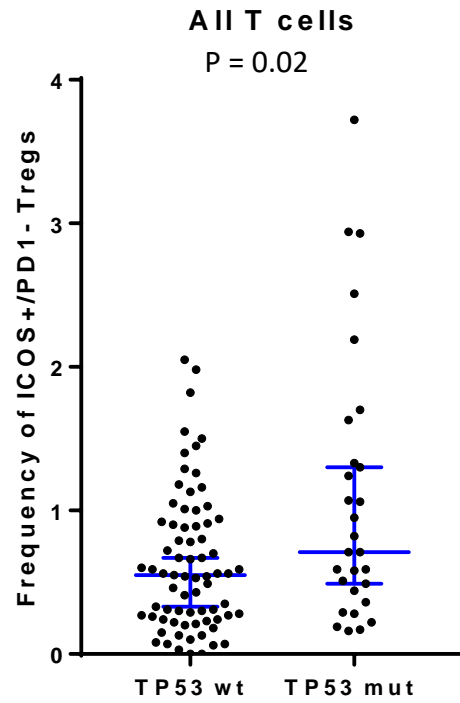



**Figure S9**

***TP53* mutant CTLs**

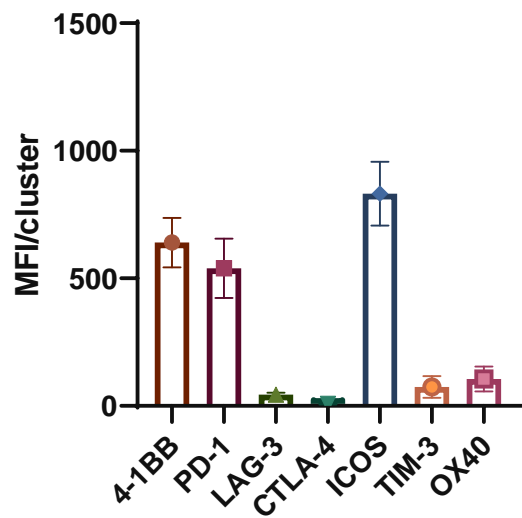

***TP53* mutant T<sub>H</sub> Cells**

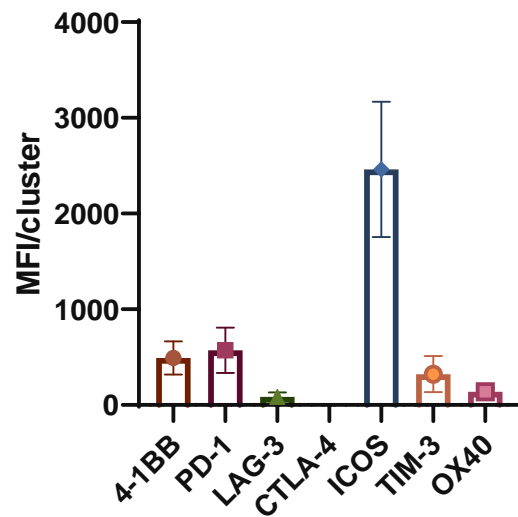

***TP53* mutant Tregs**

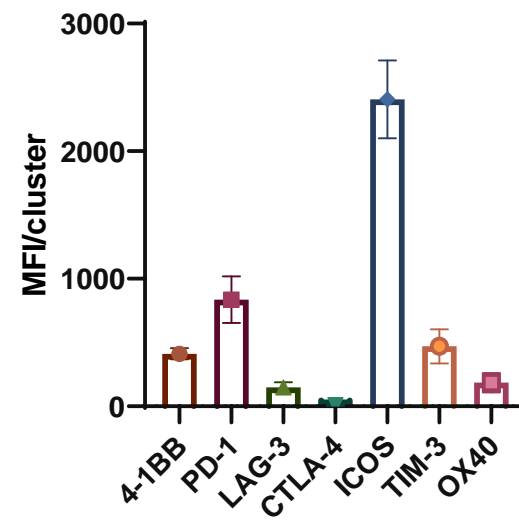

**Figure S10**

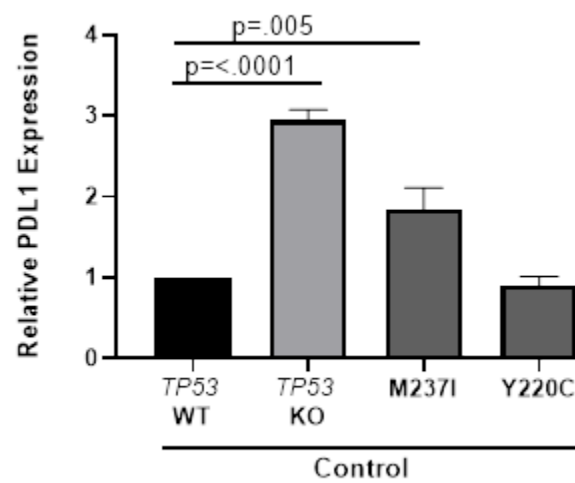

Figure S111

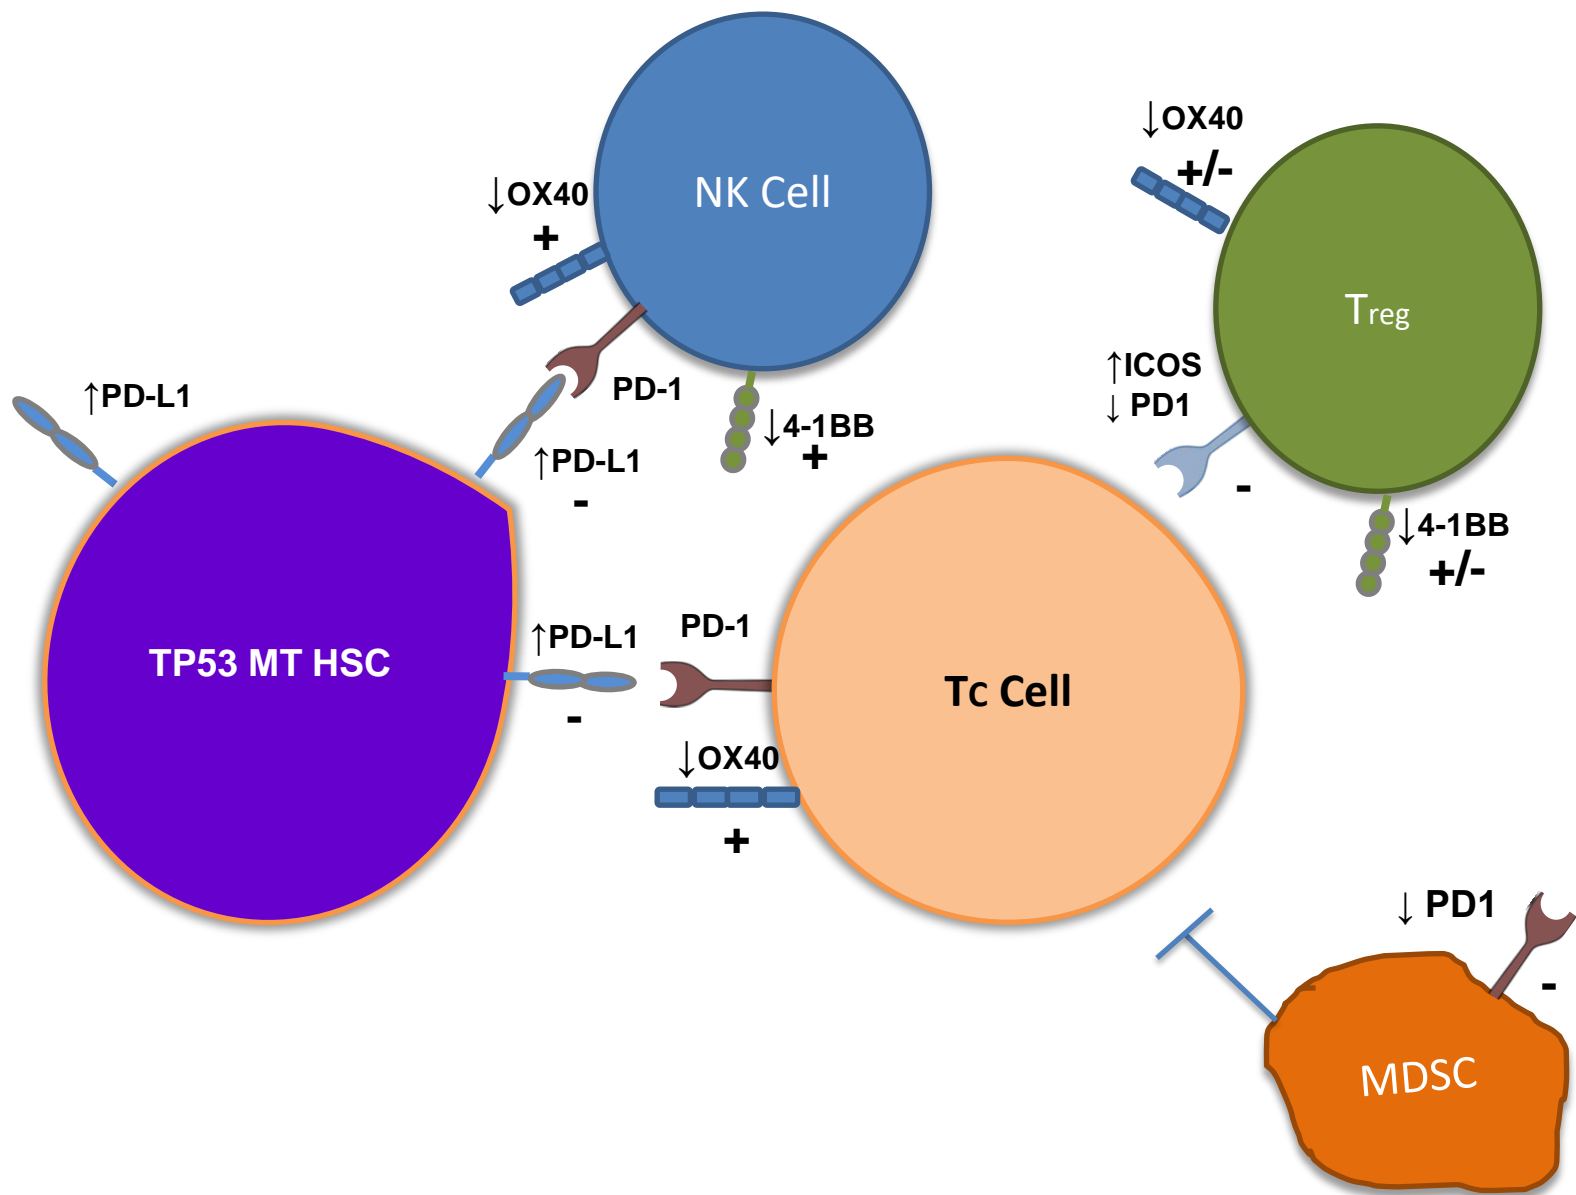

Supplement: bloodBLD2020006158-suppl1.pdf [file bloodBLD2020006158-suppl1.pdf]
